# Supplementary material for: Characterizing the likelihood of dengue emergence and detection in naïve populations
Source: PubMed Central journal article supplement (PMC4082489; doi:10.1186/1756-3305-7-282), 2014-06-23
Supplement: 1756-3305-7-282-S1.pdf [file 1756-3305-7-282-S1.pdf]

## Supplemental Information

### Variable Definitions:

|                 |                                                |
|-----------------|------------------------------------------------|
| Sh              | Number of susceptible humans                   |
| Eh              | Number of exposed humans (ID0)                 |
| I <sub>1</sub>  | Number of humans in infectious class 1 (ID1)   |
| I <sub>2</sub>  | Number of humans in infectious class 2 (ID2)   |
| I <sub>3</sub>  | Number of humans in infectious class 3 (ID3)   |
| I <sub>4</sub>  | Number of humans in infectious class 4 (ID4)   |
| I <sub>5</sub>  | Number of humans in infectious class 5 (ID5)   |
| I <sub>6</sub>  | Number of humans in infectious class 6 (ID6)   |
| I <sub>7</sub>  | Number of humans in infectious class 7 (ID7)   |
| I <sub>8</sub>  | Number of humans in infectious class 8 (ID8)   |
| I <sub>9</sub>  | Number of humans in infectious class 9 (ID9)   |
| I <sub>10</sub> | Number of humans in infectious class 10 (ID10) |
| Nh              | Total number of humans                         |
| Sm              | Number of susceptible mosquitoes               |
| Em              | Number of exposed mosquitoes                   |
| Im              | Number of infectious mosquitoes                |

### Initial Conditions:

Sh = 38,000; Eh, I<sub>1-10</sub> = 1 or 0; Rh=0; Sm=7500; Em=0; Im=0

### Viremia Curve Fitting and extrapolation of missing points:

The Weibull density is given by:

$$f(x) = \frac{k}{\lambda} \left(\frac{x}{\lambda}\right)^{k-1} e^{-\left(\frac{x}{\lambda}\right)^k}$$

Let the viremia data from [20] be  $v_{data}$ , and the curve fit be  $v_{fit}$ . Then:

$$v_{fit} \sim \text{Weibull} (k=6.4, \lambda=1.9) \text{ and } (v_{fit} * 65) = v_{data} \text{ (Figure S1A)}$$

### Acquisition curve fitting and extrapolation of missing points:

Let the acquisition values extrapolated from [20] but based on the viremia data above be

$q_{data}$  and the curve fit be  $q_{fit}$ . Then:

$$q_{fit} \sim \text{logistic} (\mu=6.5, \sigma=0.75) \text{ (Figure S1B)}$$

Where the logistic distribution function is given by:

$$F(x) = \frac{1}{1 + e^{\left(\frac{x-\mu}{\sigma}\right)}}$$

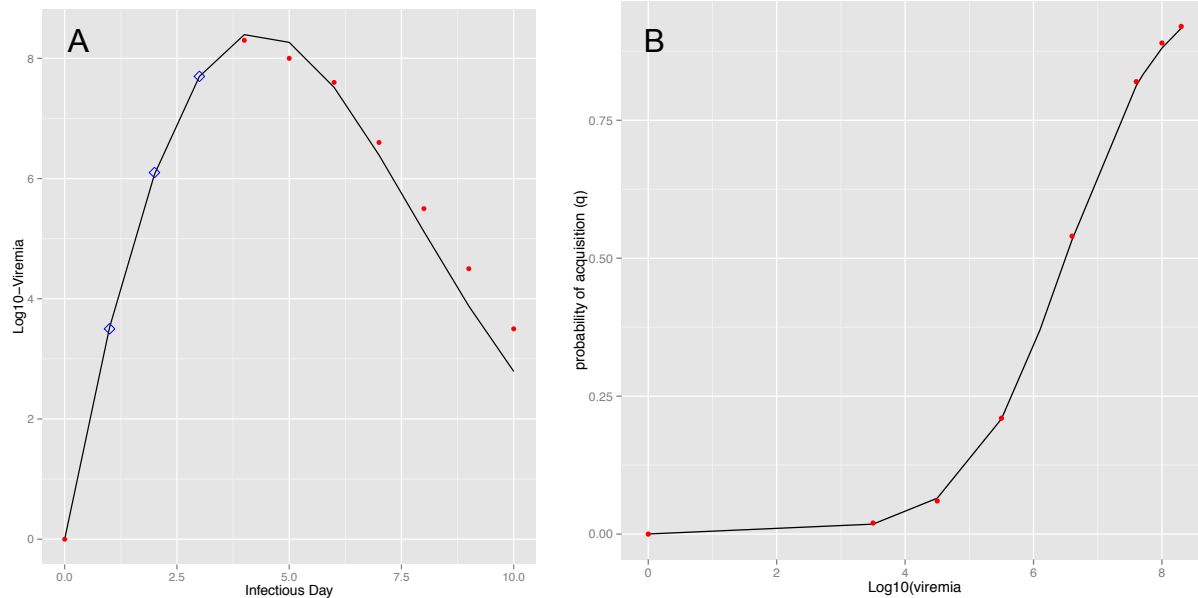

**Figure S1A: Viremia data and extrapolation:** Viremia data from Nguyen, et al. (red points) and the extrapolation of viremia at ID1-3 (blue squares) based on the fitted curve (black line). **S1B: Acquisition data and extrapolation:** Acquisition data from Nguyen, et al. (red points) and the extrapolation to viremia points extrapolated in Figure S1A (blue squares) based on the fitted curve (black line).

**Table S1: Probabilities of emergence and detection of DENV-1, Average proportion of population infected and Average time between detection and peak number of cases:** For each contact rate and infectious day (ID) of the index case upon introduction into a naïve population this table lists the probabilities of emergence and detection (cases  $\geq 50$ ), the average cumulative proportion of the population infected (after 365 days and at peak) and the average time (in days) between the detection of DENV-1 (cases  $\geq 50$ ) and the peak of the epidemic curve.

| Daily contact rate (a) | ID | Probability of emergence | Cumulative % infected population | Cumulative % Infected at peak | Time to peak relative to detection (in days) |
|------------------------|----|--------------------------|----------------------------------|-------------------------------|----------------------------------------------|
| 2                      | 0  | 76.55%                   | >99                              | 68.6                          | 28                                           |
| 2                      | 1  | 73.20%                   | >99                              | 67.9                          | 28                                           |
| 2                      | 2  | 72.00%                   | >99                              | 68.6                          | 28                                           |
| 2                      | 3  | 69.60%                   | >99                              | 68.1                          | 28                                           |
| 2                      | 4  | 60.05%                   | >99                              | 68.2                          | 28                                           |
| 2                      | 5  | 50.15%                   | >99                              | 68.3                          | 28                                           |
| 2                      | 6  | 36.20%                   | >99                              | 67.8                          | 28                                           |

|      |    |        |             |             |     |
|------|----|--------|-------------|-------------|-----|
| 2    | 7  | 21.20% | >99         | 68.7        | 28  |
| 2    | 8  | 7.30%  | >99         | 69.3        | 28  |
| 2    | 9  | 2.40%  | >99         | 66.3        | 28  |
| 2    | 10 | 0.45%  | >99         | 64.9        | 28  |
| 1    | 0  | 49.30% | >99         | 62.3        | 49  |
| 1    | 1  | 49.05% | >99         | 62.5        | 49  |
| 1    | 2  | 45.25% | >99         | 62.5        | 49  |
| 1    | 3  | 43.25% | >99         | 63.2        | 49  |
| 1    | 4  | 35.00% | >99         | 62.4        | 49  |
| 1    | 5  | 27.15% | >99         | 62.7        | 49  |
| 1    | 6  | 18.85% | >99         | 62.7        | 49  |
| 1    | 7  | 9.65%  | >99         | 62.3        | 49  |
| 1    | 8  | 3.75%  | >99         | 63.3        | 49  |
| 1    | 9  | 1.10%  | >99         | 62.6        | 49  |
| 1    | 10 | 0.25%  | >99         | 64.1        | 49  |
| 0.75 | 0  | 39.15% | >99         | 58.93748843 | 63  |
| 0.75 | 1  | 37.00% | >99         | 59.15036224 | 63  |
| 0.75 | 2  | 36.00% | >99         | 59.23561028 | 63  |
| 0.75 | 3  | 32.90% | >99         | 59.36390577 | 63  |
| 0.75 | 4  | 28.15% | >99         | 59.36891941 | 63  |
| 0.75 | 5  | 21.65% | >99         | 59.48033428 | 63  |
| 0.75 | 6  | 13.65% | >99         | 59.52627398 | 63  |
| 0.75 | 7  | 8.05%  | >99         | 59.58290554 | 63  |
| 0.75 | 8  | 2.65%  | >99         | 59.68093347 | 63  |
| 0.75 | 9  | 0.80%  | >99         | 59.86190476 | 63  |
| 0.75 | 10 | 0.10%  | >99         | 58.6        | 63  |
| 0.5  | 0  | 24.35% | 96.8        | 52.3585308  | 105 |
| 0.5  | 1  | 24.50% | 96.8        | 52.66330599 | 105 |
| 0.5  | 2  | 22.70% | 96.8        | 52.38901716 | 112 |
| 0.5  | 3  | 22.50% | 96.8        | 52.32870504 | 112 |
| 0.5  | 4  | 16.45% | 96.8        | 52.31671742 | 112 |
| 0.5  | 5  | 12.10% | 96.8        | 52.67823959 | 105 |
| 0.5  | 6  | 8.10%  | 96.8        | 52.56668191 | 105 |
| 0.5  | 7  | 4.10%  | 96.8        | 52.42643724 | 105 |
| 0.5  | 8  | 1.60%  | 96.8        | 52.85283813 | 112 |
| 0.5  | 9  | 0.40%  | 96.8        | 54.96527256 | 112 |
| 0.5  | 10 | 0.05%  | 96.8        | 53.15263158 | 105 |
| 0.33 | 0  | 12.20% | 63.62013158 | 34.98331579 | 245 |
| 0.33 | 1  | 9.95%  | 63.71815789 | 34.91186842 | 252 |
| 0.33 | 2  | 10.40% | 67.53331579 | 34.00894737 | 245 |
| 0.33 | 3  | 9.10%  | 61.73278947 | 32.90463158 | 252 |

|      |    |       |             |             |     |
|------|----|-------|-------------|-------------|-----|
| 0.33 | 4  | 6.65% | 61.39044737 | 34.30913158 | 252 |
| 0.33 | 5  | 6.75% | 63.11160526 | 34.35884211 | 245 |
| 0.33 | 6  | 3.75% | 67.96513158 | 35.09852632 | 252 |
| 0.33 | 7  | 1.90% | 70.73710526 | 36.54939474 | 252 |
| 0.33 | 8  | 0.60% | 54.54055263 | 32.92621053 | 252 |
| 0.33 | 9  | 0.15% | 47.8965     | 35.84386842 | 259 |
| 0.33 | 10 | 0.05% | 59.21842105 | 40.56052632 | 252 |
| 0.25 | 0  | 4.55% | 1.973216131 | 1.513332631 | 238 |
| 0.25 | 1  | 4.40% | 2.283018538 | 1.647577307 | 245 |
| 0.25 | 2  | 4.00% | 2.112758221 | 1.575638227 | 245 |
| 0.25 | 3  | 3.65% | 2.257709519 | 1.640164223 | 252 |
| 0.25 | 4  | 3.40% | 1.987136485 | 1.3712794   | 231 |
| 0.25 | 5  | 2.40% | 2.191175044 | 1.717962188 | 245 |
| 0.25 | 6  | 1.40% | 2.159831854 | 1.640957063 | 259 |
| 0.25 | 7  | 0.55% | 1.469439508 | 0.880002278 | 224 |
| 0.25 | 8  | 0.05% | 3.731578947 | 3.523684211 | 259 |

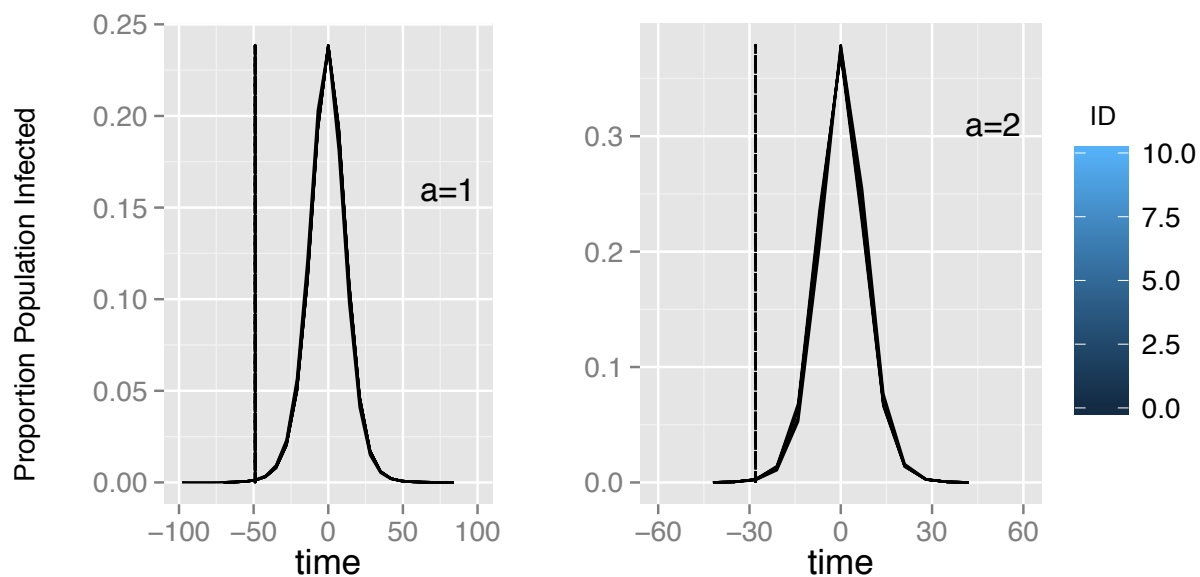

**Figure S2:** The proportion of the population infected (y-axes) plotted against centered time (x-axes) for contact rates  $a=[1,2]$  and each day of introduction relative to the index case infectious day (ID) (indicated by colorbar, but corresponding curves largely overlap). Vertical lines indicate the time of detection relative to peak cases at  $t=0$ .

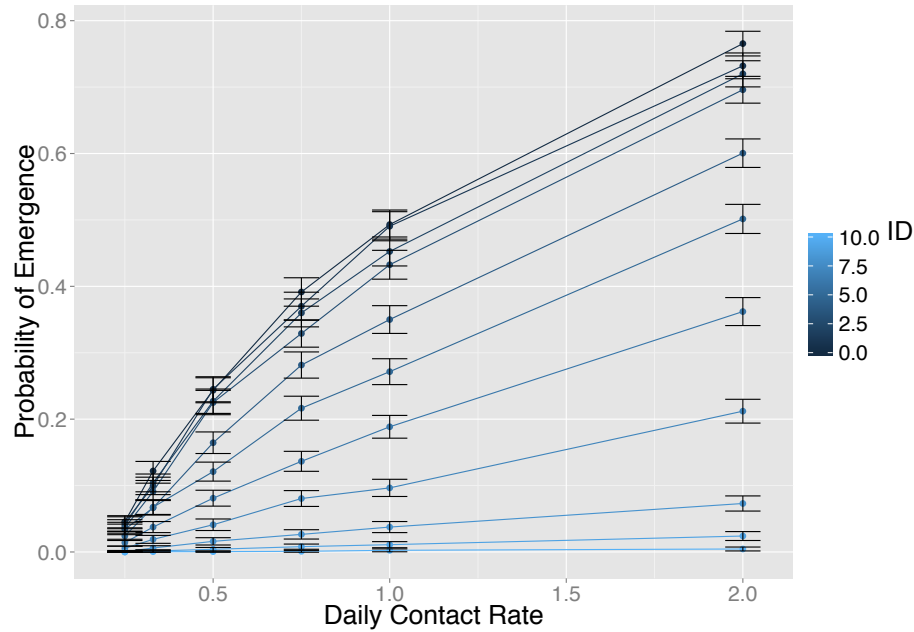

**Figure S3:** Nonlinear relationship between contact rate (a) and the probability of emergence of DENV1.

Basic Reproductive Number (R0) calculations for SEI<sub>10</sub>R and SEI<sub>1</sub>R:

SEI<sub>10</sub>R:

$$R0 = a^2 \left( \frac{\varepsilon_m}{\mu N_h} \right) \frac{b}{(b + \mu)\mu} \sum_{i=1}^{10} \frac{q_i}{v_i}$$

SEI<sub>1</sub>R:

$$R0 = a^2 \left( \frac{\varepsilon_m}{\mu N_h} \right) \frac{b}{(b + \mu)\mu} (q_{avg} * 10)$$

where  $q_{avg} = \frac{\sum q_i}{10}$ .

**Table S2: Results of SEI<sub>1</sub>R model:** The probability of emergence, cumulative % of population infected and % infected at peak, as well as time (in days) from detection to epidemic peak for the SEI<sub>1</sub>R model are given below.

| Daily contact rate (a) | Probability of emergence | Cumulative % infected population | Cumulative % infected at peak | Time to peak relative to detection (in days) |
|------------------------|--------------------------|----------------------------------|-------------------------------|----------------------------------------------|
| 2                      | 60.25%                   | >99                              | 68.2                          | 35                                           |
| 1                      | 41.85%                   | >99                              | 62.4                          | 56                                           |
| 0.75                   | 33.05%                   | >99                              | 59                            | 77                                           |
| 0.5                    | 23.55%                   | 97.2                             | 52.5                          | 126                                          |
| 0.33                   | 9.95%                    | 45.9                             | 23.7                          | 252                                          |
| 0.25                   | 4.70%                    | 1.3                              | 0.88                          | n/a                                          |

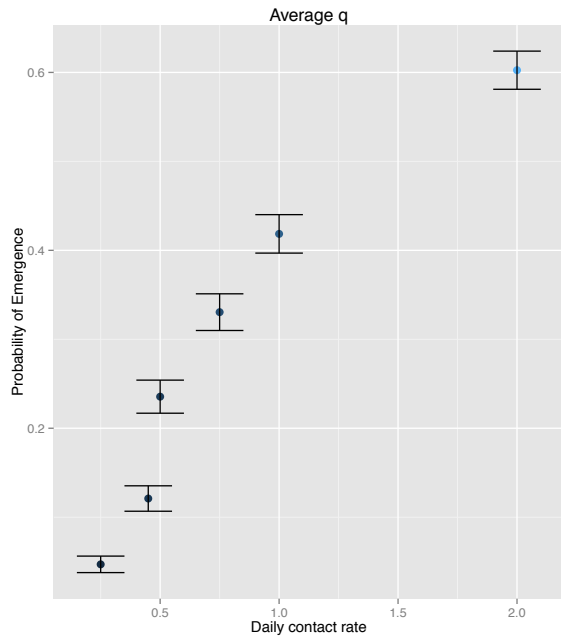

**Figure S4:** Probability of emergence given by the simple model structure of SEI<sub>1</sub>R (compare to Figure S3).

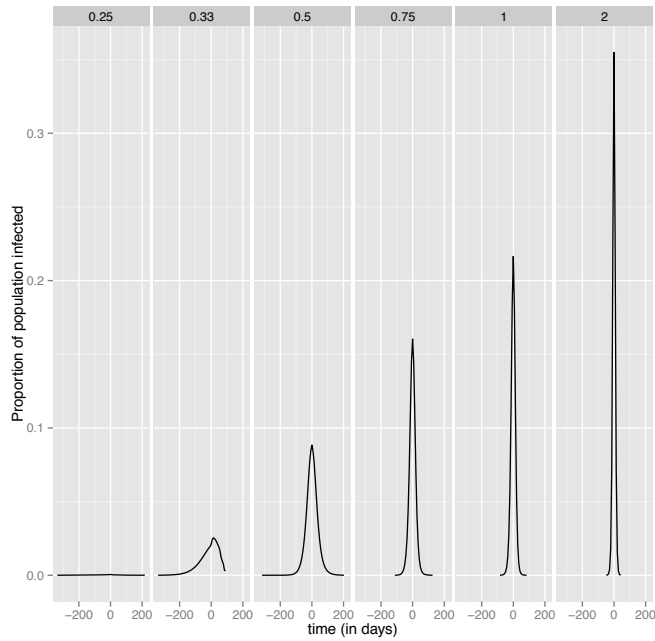

**Figure S5:** Epidemic curves from the simple SEI<sub>1</sub>R model (compare to in-text Figure 4 and Figure S2).
